# Supplementary material
Source: PubMed Central journal article supplement (PMC6424601)

**Supporting Information for:  
Discovery of Novel N-(4-Hydroxybenzyl)valine Hemoglobin  
Adducts in Human Blood**

Amanda Degner<sup>†,§</sup>, Henrik Carlsson<sup>‡,§</sup>, Isabella Karlsson<sup>‡,§</sup>, Johan Eriksson<sup>‡</sup>, Suresh S. Pujari<sup>†</sup>, Natalia Y. Tretyakova<sup>†</sup>, and Margareta Törnqvist<sup>‡,\*</sup>

<sup>†</sup>Department of Medicinal Chemistry and the Masonic Cancer Center, University of Minnesota, Minneapolis, MN 55455, USA

<sup>‡</sup>Department of Environmental Science and Analytical Chemistry, Stockholm University, SE-106 91 Stockholm, Sweden

<sup>§</sup>These authors contributed equally to this work.

\*Correspondence: [margareta.tornqvist@aces.su.se](mailto:margareta.tornqvist@aces.su.se)

Supporting Information containing:

<sup>1</sup>H and <sup>135</sup>DEPT NMR spectra of the synthesized 4-QM precursor, <sup>1</sup>H and HSQC NMR spectra of synthesized 4-OHBn-ValpNA, Bn-Val, 2-OHBn-Val, 3-OHBn-Val, 4-OHBn-Val, and proposed MS fragments of 4-OHBn-Val-FTH.

**Supplemental Figure 1.** NMR spectrum of 4-QM precursor (compound **3**).

a)  $^1\text{H}$  NMR spectrum

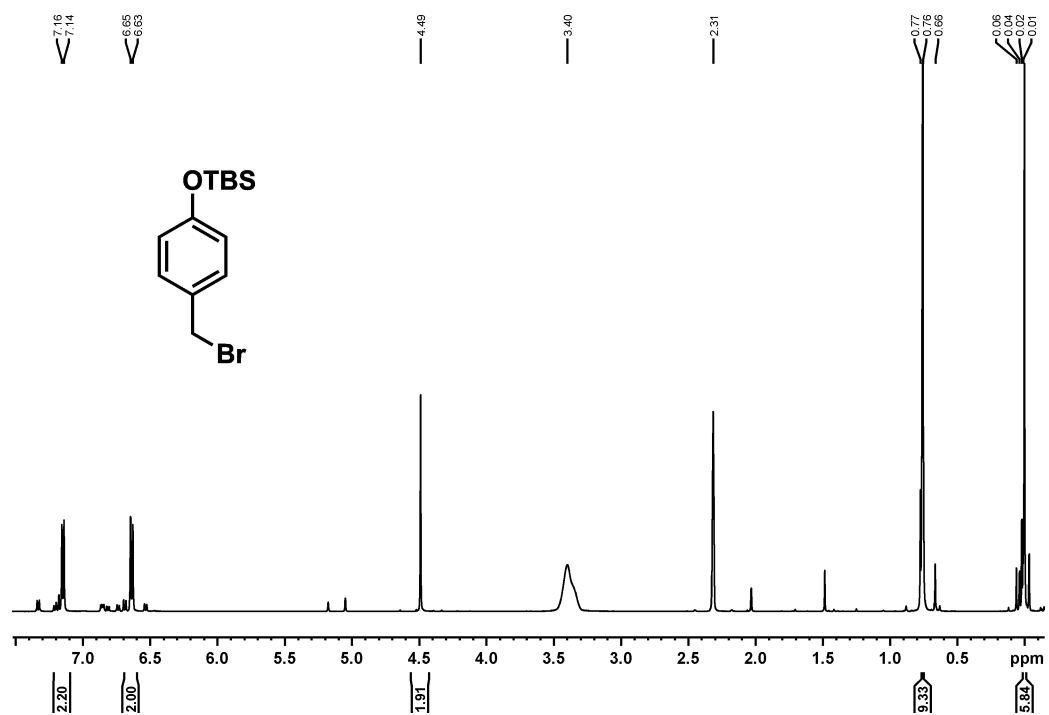

b)  $^{135}\text{DEPT}$  NMR spectrum

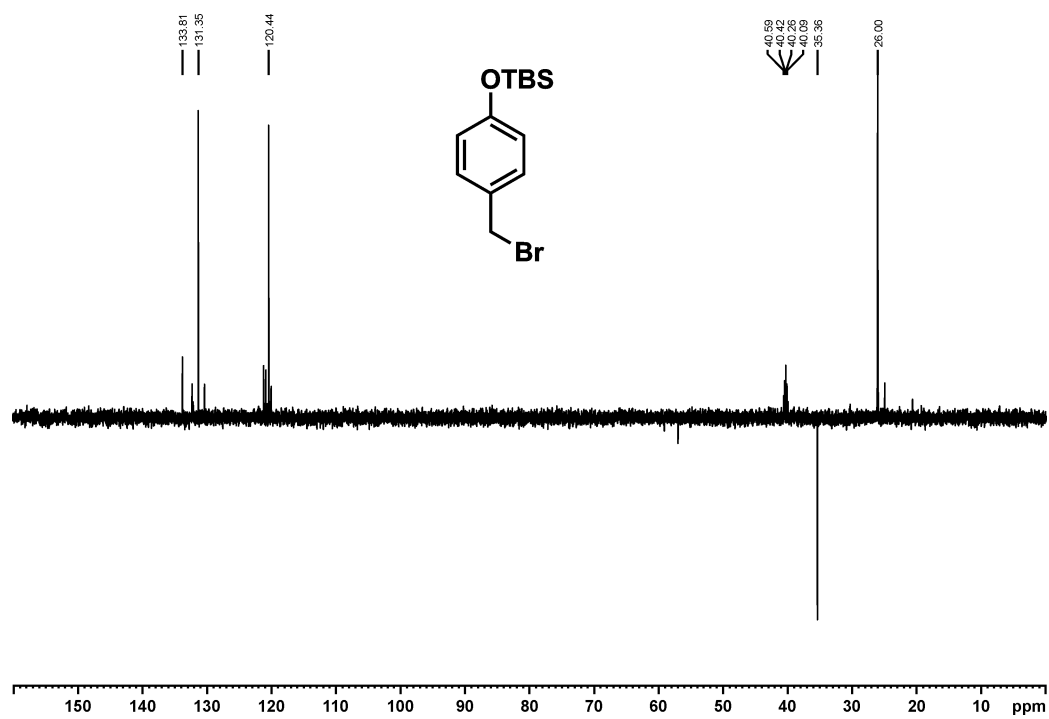

**Supplemental Figure 2.** NMR spectrum of 4-OHbn-ValpNA (compound **9**).

a)  $^1\text{H}$  NMR spectrum

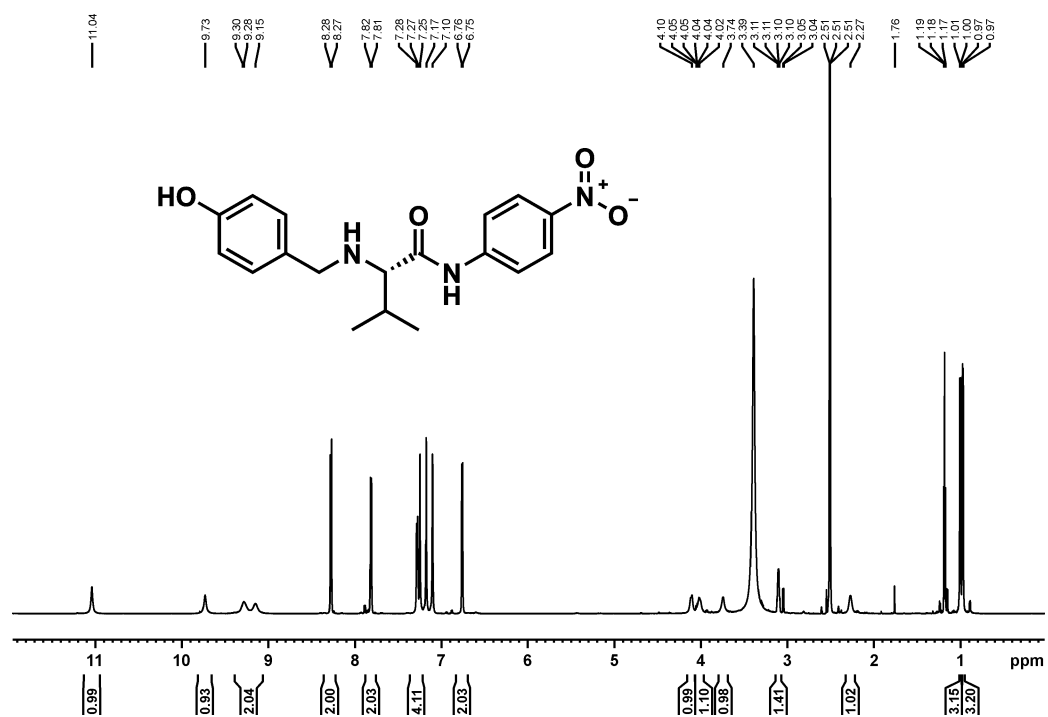

b) HSQC NMR spectrum

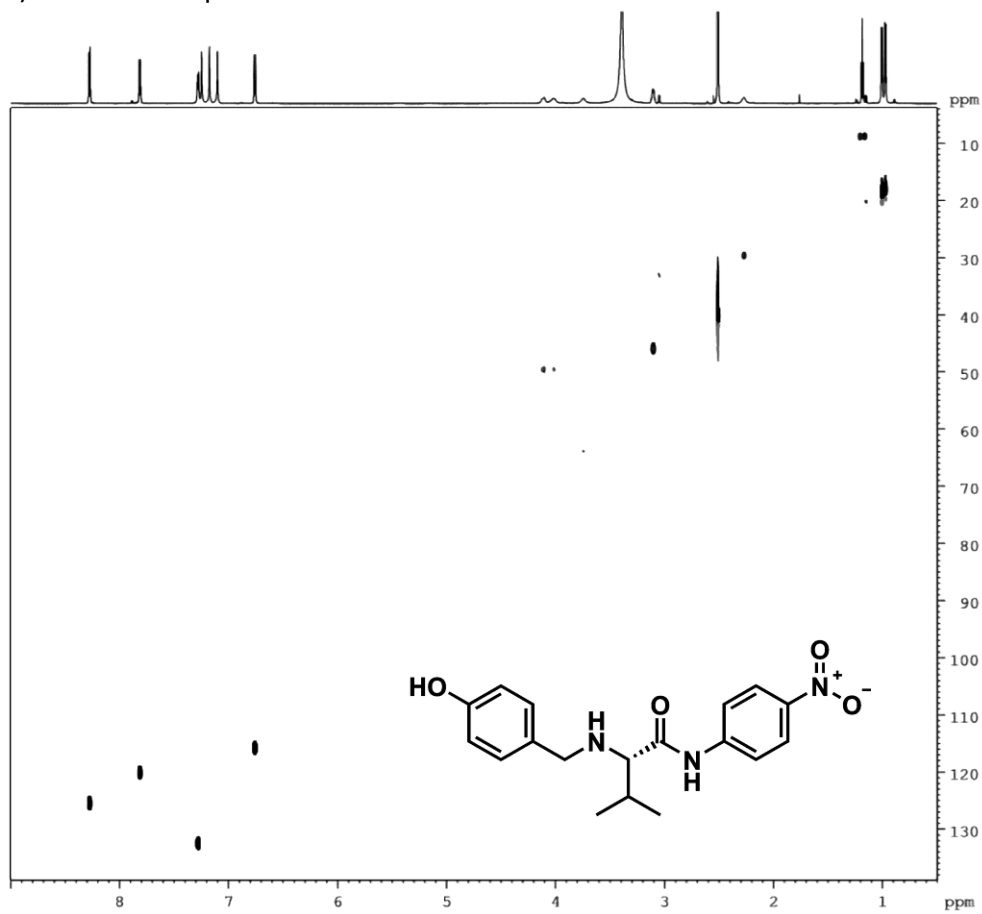

**Supplemental Figure 3.** NMR spectrum of N-benzylvaline (Bn-Val) (compound **11**) synthesized from benzaldehyde.

a)  $^1\text{H}$  NMR spectrum

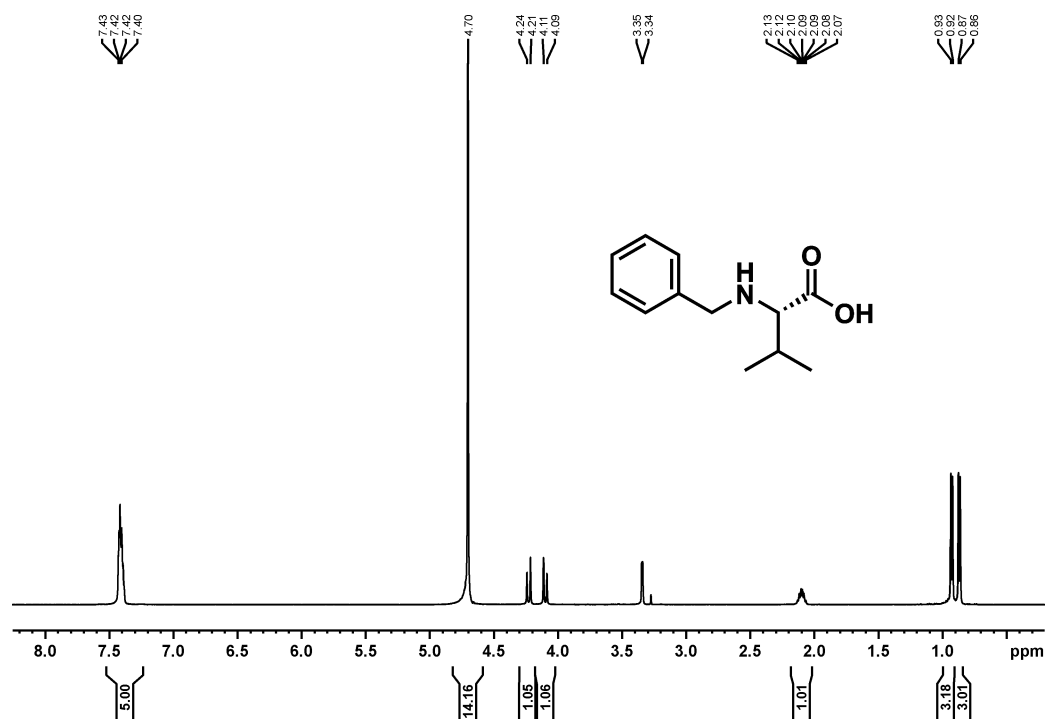

b) HSQC NMR spectrum

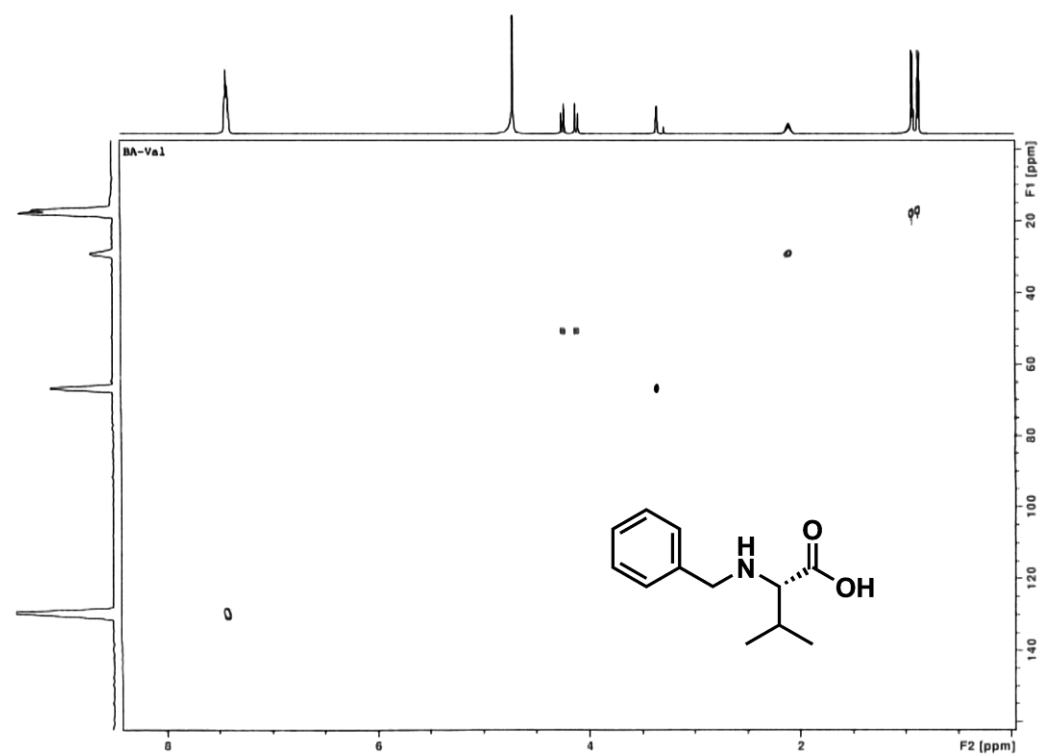

**Supplemental Figure 4.** NMR spectrum of N-(2-hydroxybenzyl)valine (2-OHBn-Val) (compound **12**) synthesized from 2-hydroxybenzaldehyde.

a)  $^1\text{H}$  NMR spectrum

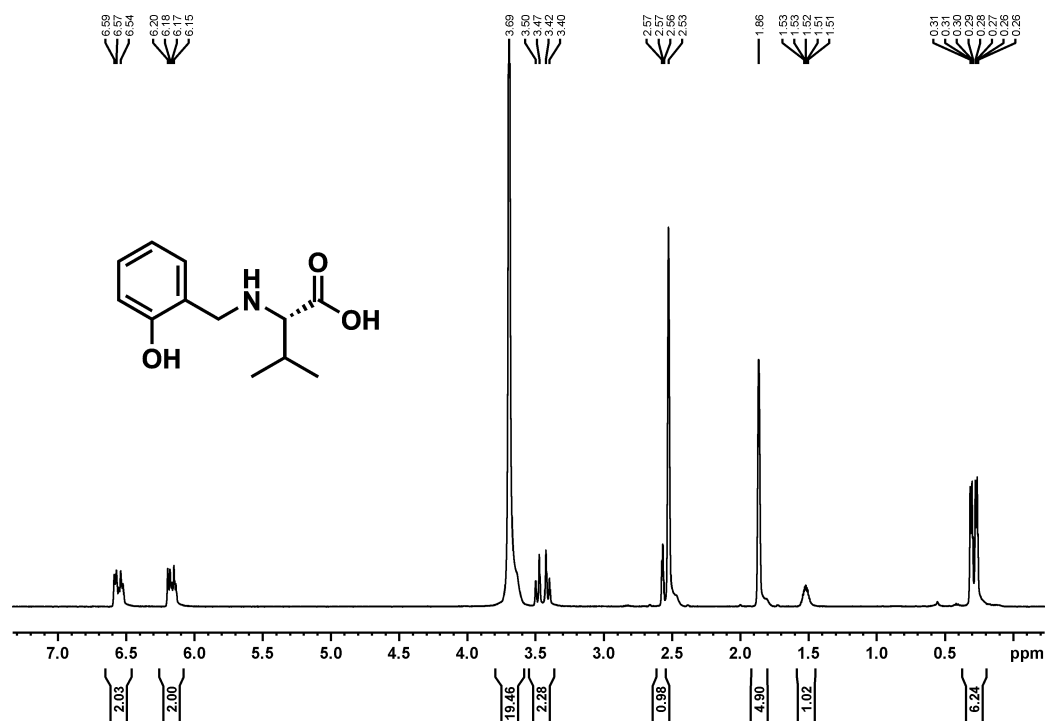

b) HSQC NMR spectrum

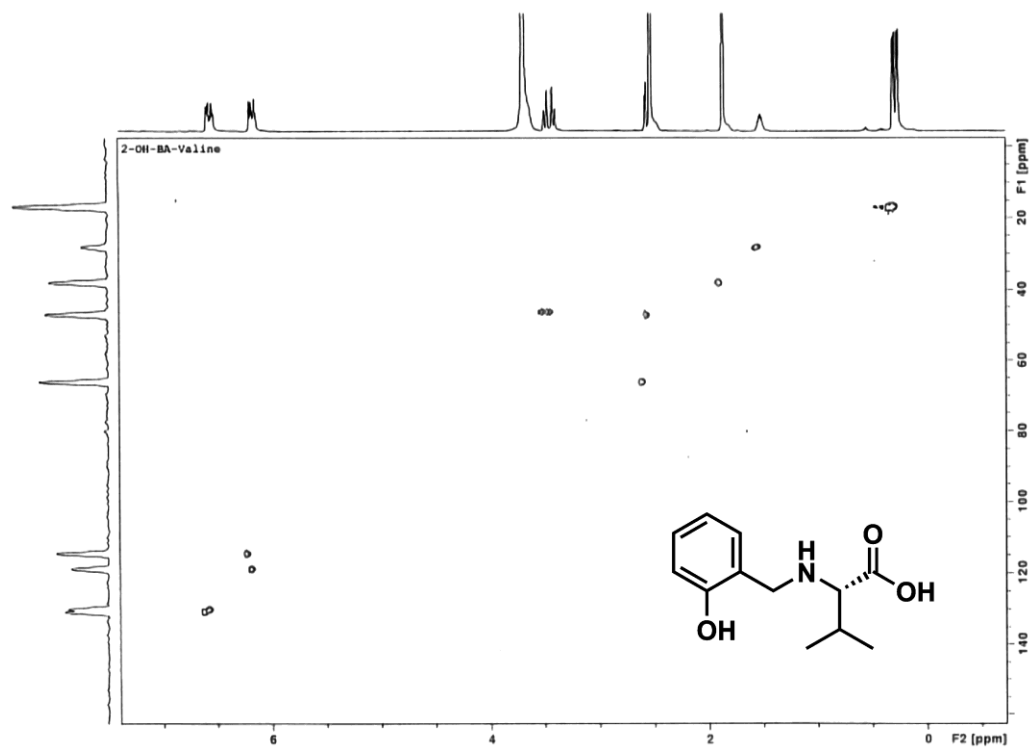

**Supplemental Figure 5.** NMR spectrum of N-(3-hydroxybenzyl)valine (3-OHBn-Val) (compound **13**) synthesized from 3-hydroxybenzaldehyde.

a)  $^1\text{H}$  NMR spectrum

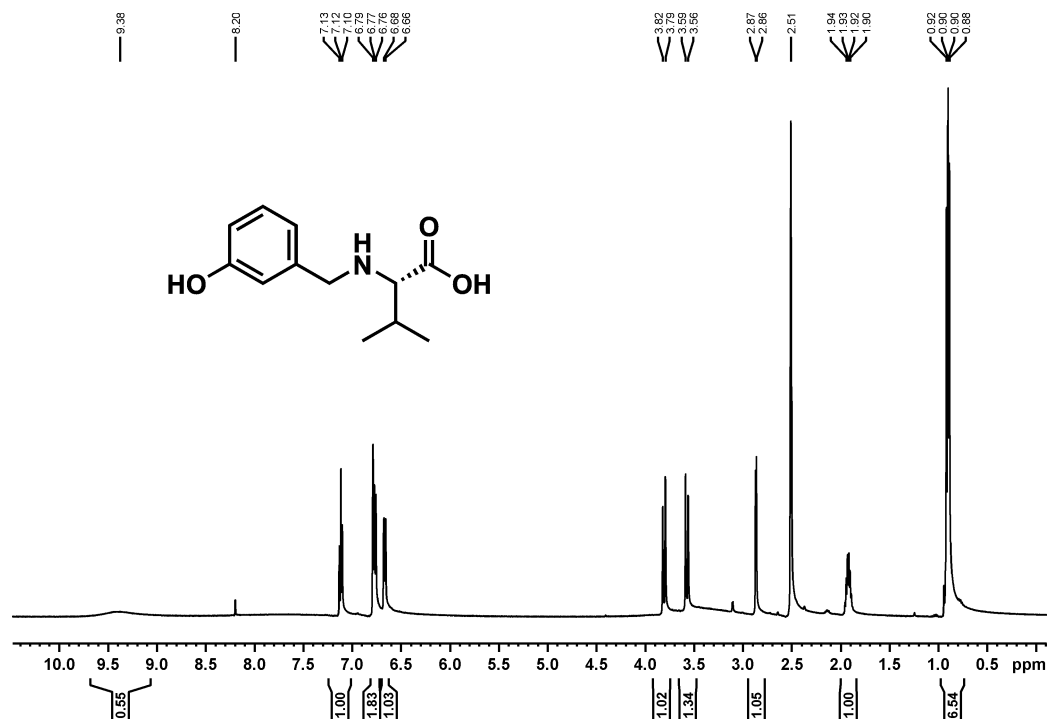

b) HSQC NMR spectrum

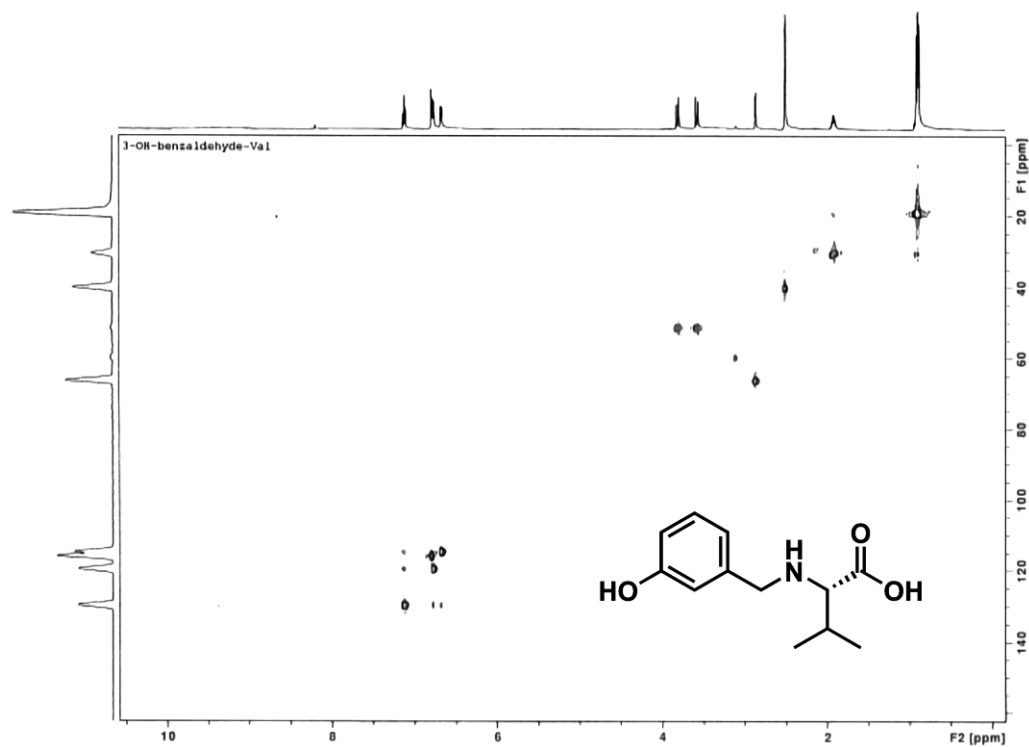

**Supplemental Figure 6.** NMR spectrum of N-(4-hydroxybenzyl)valine (4-OHBn-Val) (compound **14**) synthesized from 4-hydroxybenzaldehyde.

a)  $^1\text{H}$  NMR spectrum

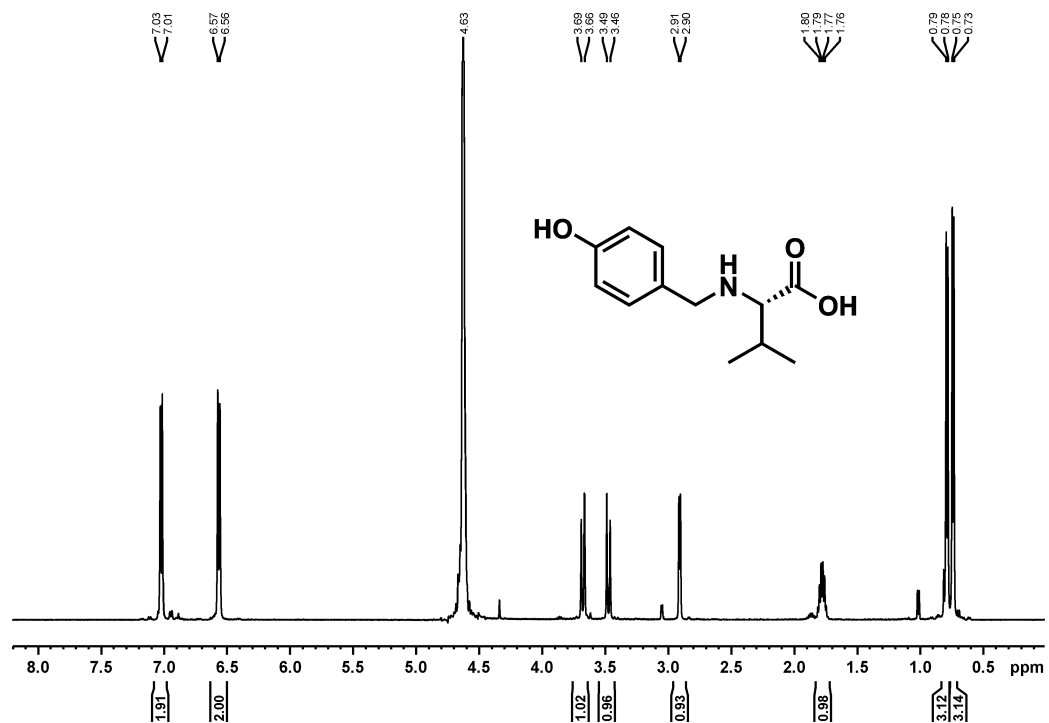

b) HSQC NMR spectrum

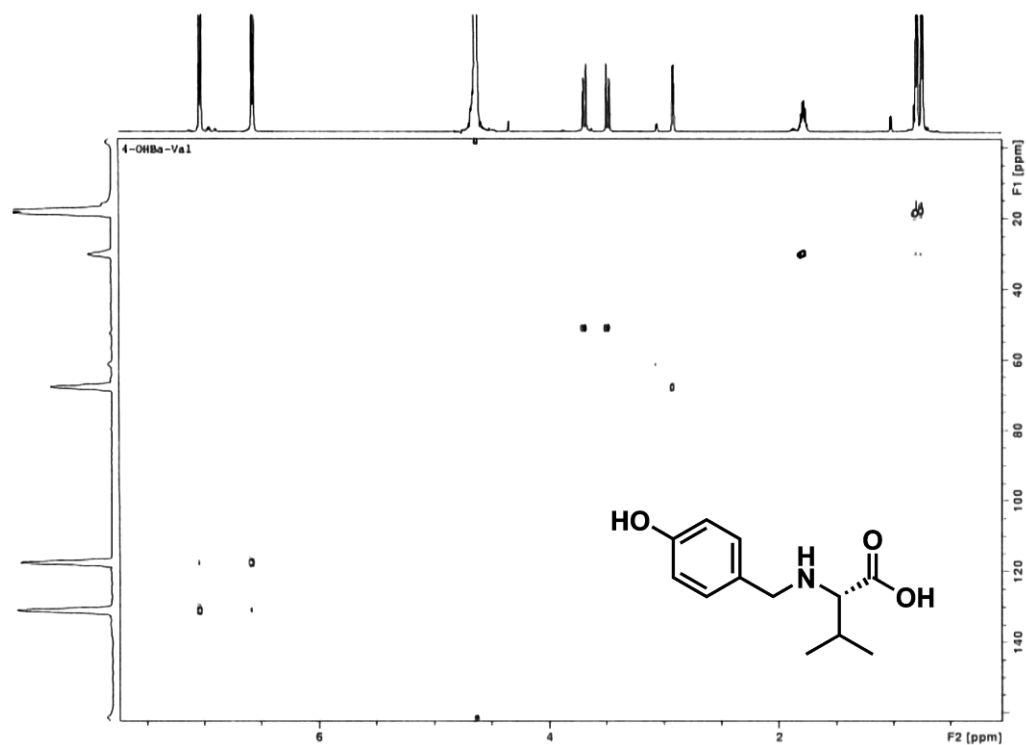

**Supplemental Figure 7.** Proposed MS fragments of 4-OHBn-Val-FTH (compound **10**) (cf. Figure 2B).

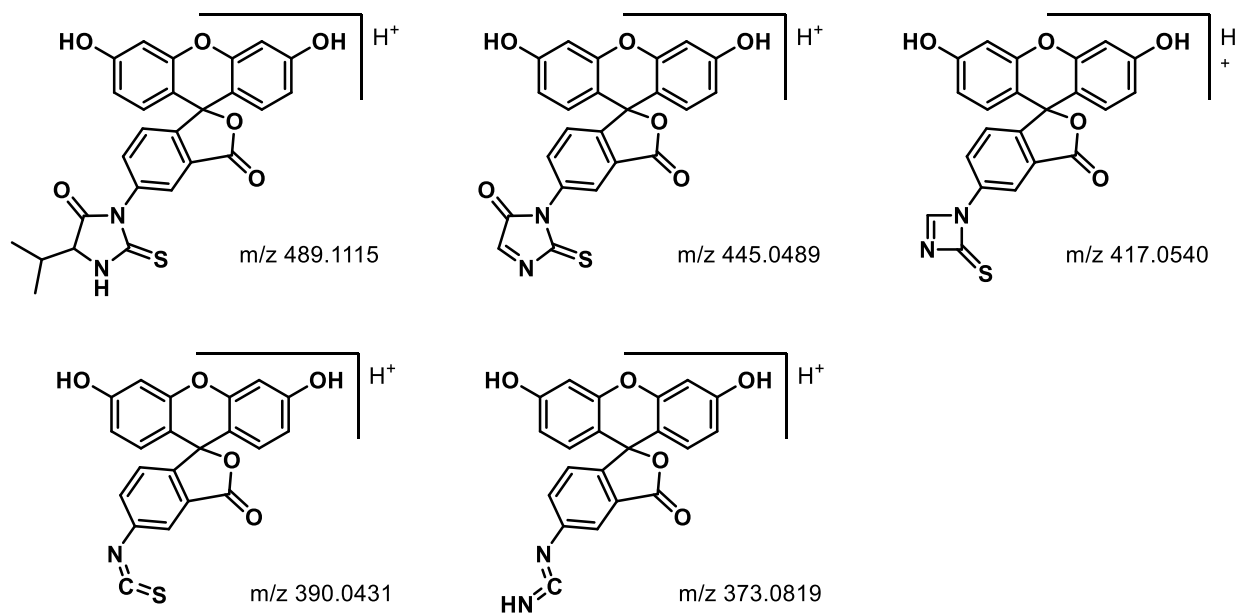

Supplement: NIHMS1003722-supplement-Supplemental_meterials.pdf [file NIHMS1003722-supplement-Supplemental_meterials.pdf]
